# Supplementary material for: Structural and Biochemical Characterization of the Cop9 Signalosome CSN5/CSN6 Heterodimer
Source: PLOS journal article supplement (doi:10.1371/journal.pone.0105688), 2014-08-21
Supplement: S2 (10.1371/journal.pone.0105688.s002) [file journal.pone.0105688.s002]

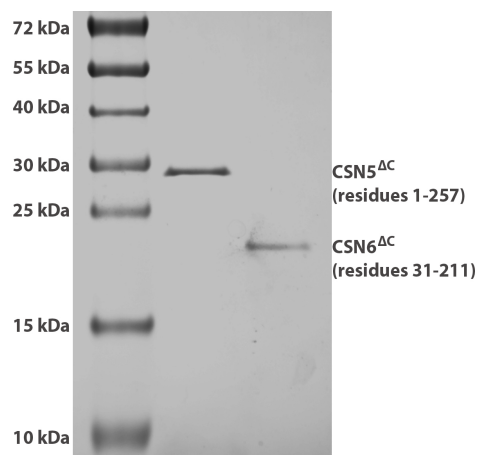

**Figure S2. SDS-Page of CSN5<sup>ΔC</sup> and CSN6<sup>ΔC</sup> proteins.**  
Molecular weight markers are shown to the left of the gel.
