# Supplementary material for: Structural and Biochemical Characterization of the Cop9 Signalosome CSN5/CSN6 Heterodimer
Source: PLOS journal article supplement (doi:10.1371/journal.pone.0105688), 2014-08-21
Supplement: S5 (10.1371/journal.pone.0105688.s005) [file journal.pone.0105688.s005]

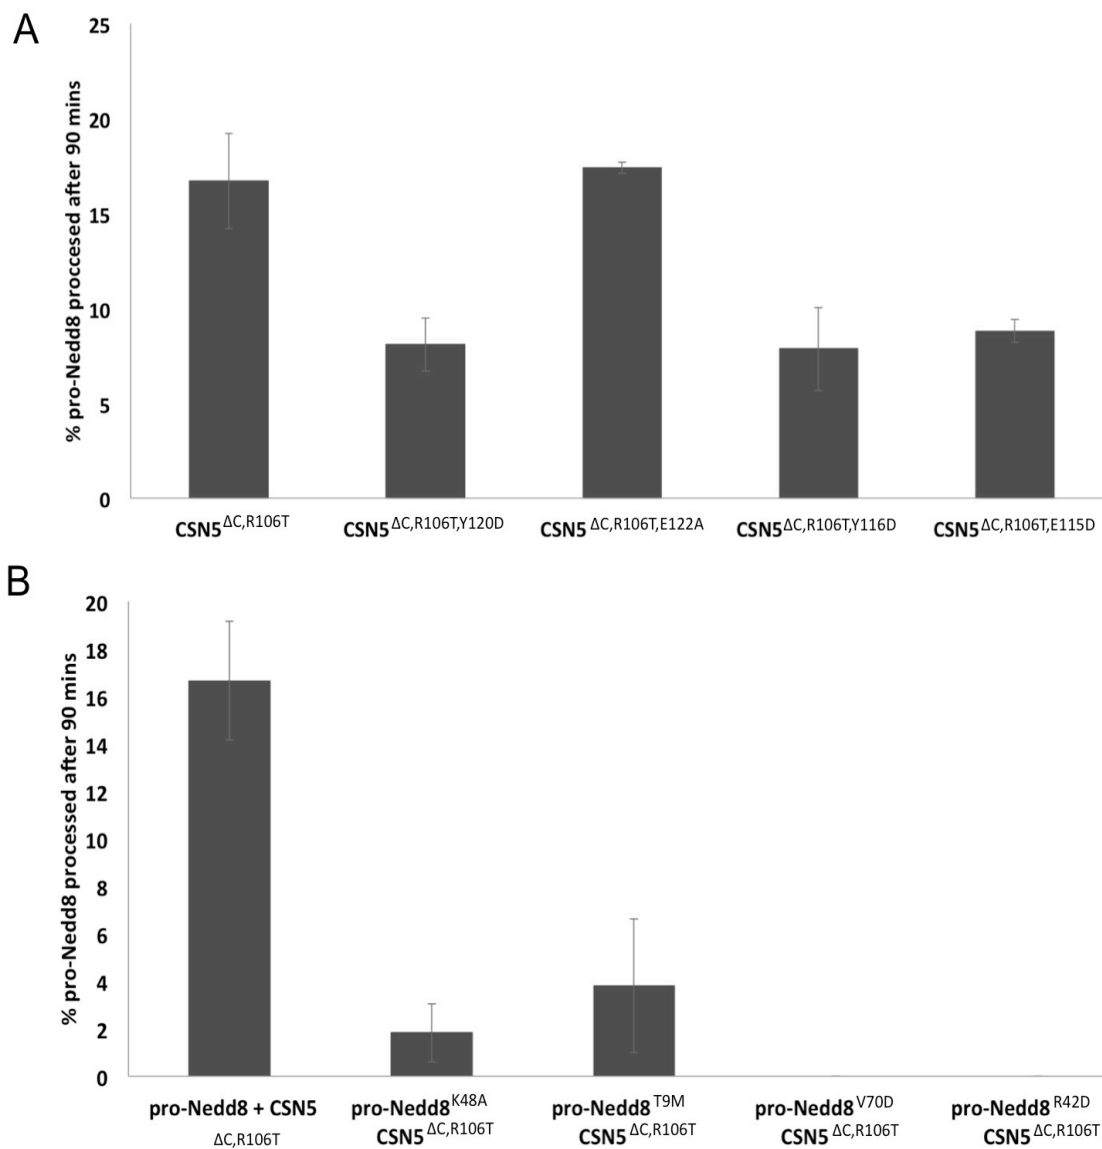

**Figure S5. Pro-Nedd8 processing by CSN5 $\Delta$ C.** (A, B) The activity of CSN5 $\Delta$ C,R106T and variants (A; Y120D, E122A, Y116D, E115A) on the processing of pro-Nedd8<sup>WT</sup> and variants (B; K48A, T9M, V70D, R42D) is displayed, as the percentage of cleaved protein after 90 min reaction. The error bar corresponds to the s.d. over two independent experiments.
